# Supplementary material
Source: Copernicus journal article supplement (doi:10.5194/acp-26-7867-2026)
Supplement: Supplementary file 1 [file acp-26-7867-2026-supplement.pdf]

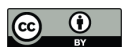

*Supplement of*

## **Impacts of lake on diurnal evolution of surface PM<sub>2.5</sub> concentrations around a typical megacity of China**

**Zining Yang et al.**

*Correspondence to:* Qike Yang (yangqike@ustc.edu.cn)

The copyright of individual parts of the supplement might differ from the article licence.

30 **Contents of this file**

31 Table S1: Description of land cover data classifications.

32 Figure S1: The spatial distribution of wind speeds at 850 hPa from ERA5 reanalysis  
33 datasets over East China.

34 Figure S2: The spatial distribution of PM<sub>2.5</sub> emissions in both the Lake and Nolake  
35 experiments.

36 Figure S3: The spatial distribution of PM<sub>2.5</sub> emissions in both the Lake\_emis and  
37 Nolake\_emis experiments.

38 Figure S4: Time series averaged over 4 AWS sites in Hefei of observed and simulated  
39 wind speed and temperature from the Lake experiment.

40 Figure S5: Diurnal variation of PM<sub>2.5</sub> near-surface concentrations within 24 h averaged  
41 over 10 MEP sites in Hefei during the study period for the Lake experiment and  
42 observations.

43 Figure S6: The spatial distribution of PM<sub>2.5</sub> near-surface concentrations from the  
44 ChinaHighPM<sub>2.5</sub> dataset.

45 Figure S7: The spatial distribution of PM<sub>2.5</sub> near-surface concentrations in the Lake  
46 experiment and the differences between Lake and Nolake experiments.

47 Figure S8: Average PM<sub>2.5</sub> surface concentration differences as a function of distance  
48 from point B toward A.

49 Figure S9: The spatial distribution of primary PM<sub>2.5</sub> near-surface concentrations in the  
50 Lake experiment and the differences between Lake and Nolake experiments.

51 Figure S10: The spatial distribution of secondary PM<sub>2.5</sub> near-surface concentrations in  
52 the Lake experiment and the differences between Lake and Nolake experiments.

53 Figure S11: The vertical cross-section of PM<sub>2.5</sub> concentration and wind vectors along  
54 the key path AC for the Lake experiment, Nolake experiment, and their differences.

55 Figure S12: The vertical profiles of PM<sub>2.5</sub> concentrations simulated in the Lake  
56 experiment, Nolake experiment, and their differences over urban and lake regions.

57 Figure S13: The spatial distribution of 10-m wind speed in the Lake experiment, Nolake  
58 experiment, and their differences.

59 Figure S14: The vertical cross-section of chemical process contributions to PM<sub>2.5</sub>  
60 concentrations during nighttime along the key path AC for the Lake experiment, Nolake  
61 experiment, and their differences.

62 Figure S15: The vertical cross-section of chemical process contributions to PM<sub>2.5</sub>  
63 concentrations at 08:00 and 14:00 LT along the key path AC for the Lake experiment,  
64 Nolake experiment, and their differences.

65 Figure S16: The spatial distribution of NO<sub>3</sub><sup>-</sup> near-surface concentrations in the Lake  
66 experiment and the differences between Lake and Nolake experiments.

67 Figure S17: The spatial distribution of NH<sub>4</sub><sup>+</sup> near-surface concentrations in the Lake  
68 experiment and the differences between Lake and Nolake experiments.

69 Figure S18: The spatial distribution of SO<sub>4</sub><sup>2-</sup> near-surface concentrations in the Lake  
70 experiment and the differences between Lake and Nolake experiments.

71 Figure S19: The spatial distribution of  $PM_{2.5}$  near-surface concentrations in the  
72 Lake\_emis experiment and the differences between Lake\_emis and Nolake\_emis  
73 experiments.

74 Figure S20: The vertical cross-section of  $PM_{2.5}$  concentration and wind vectors along  
75 the key path AC for the Lake\_emis experiment, Nolake\_emis experiment, and their  
76 differences.

77

78

79

80

81

82

83

84

85

86

87

88

89

90

91

92

**Table S1.** Description of land cover data classifications

| <b>Number</b> | <b>Description</b>               |
|---------------|----------------------------------|
| 1             | Urban                            |
| 2             | Dryland cropland/pasture         |
| 3             | Irrigated cropland/pasture       |
| 4             | Mixed Dryland/Irrigated Cropland |
| 5             | Cropland/Grassland Mosaic        |
| 6             | Cropland/Woodland Mosaic         |
| 7             | Grassland                        |
| 8             | Shrubland                        |
| 9             | Mixed Shrubland/Grassland        |
| 10            | Savanna                          |
| 11            | Deciduous Broadleaf Forest       |
| 12            | Deciduous Needleleaf Forest      |
| 13            | Evergreen Broadleaf Forest       |
| 14            | Evergreen Needleleaf Forest      |
| 15            | Mixed Forest                     |
| 16            | Water                            |
| 17            | Herbaceous Wetland               |
| 18            | Wooded Wetland                   |
| 19            | Barren or Sparsely Vegetated     |
| 20            | Herbaceous Tundra                |
| 21            | Wooded Tundra                    |
| 22            | Mixed Tundra                     |
| 23            | Bare Ground Tundra               |
| 24            | Snow or Ice                      |

94

95

96

97

98

99

100

101

102

103

104

105

106

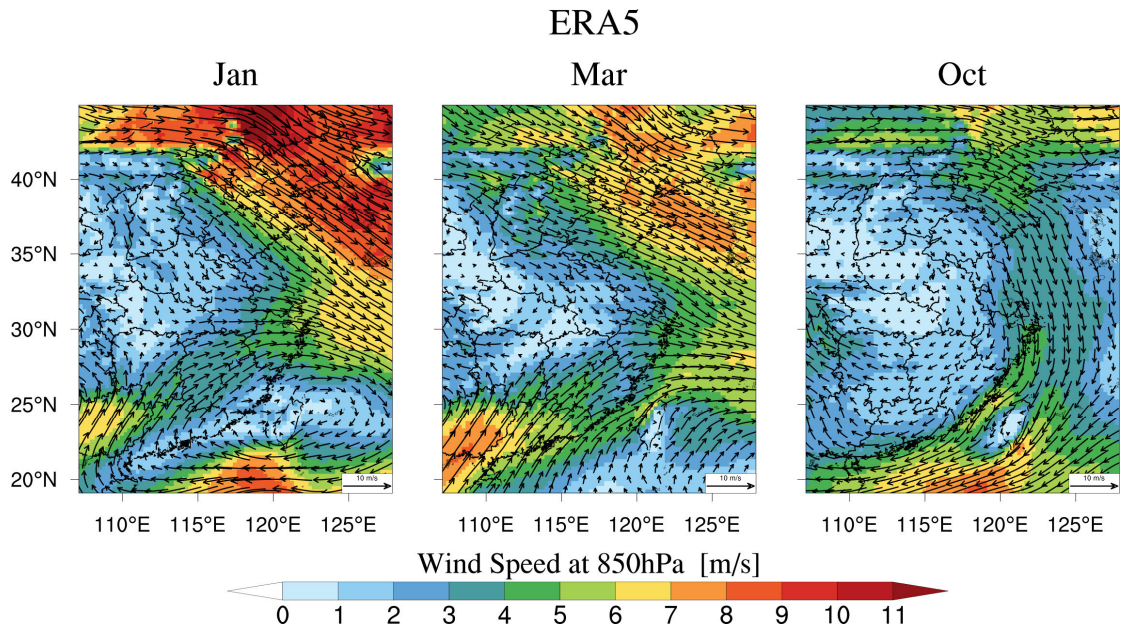

107

108 **Figure S1.** Spatial distribution of wind speeds at 850 hPa from ERA5 reanalysis

109 datasets over East China averaged for January, March, and October of 2019.

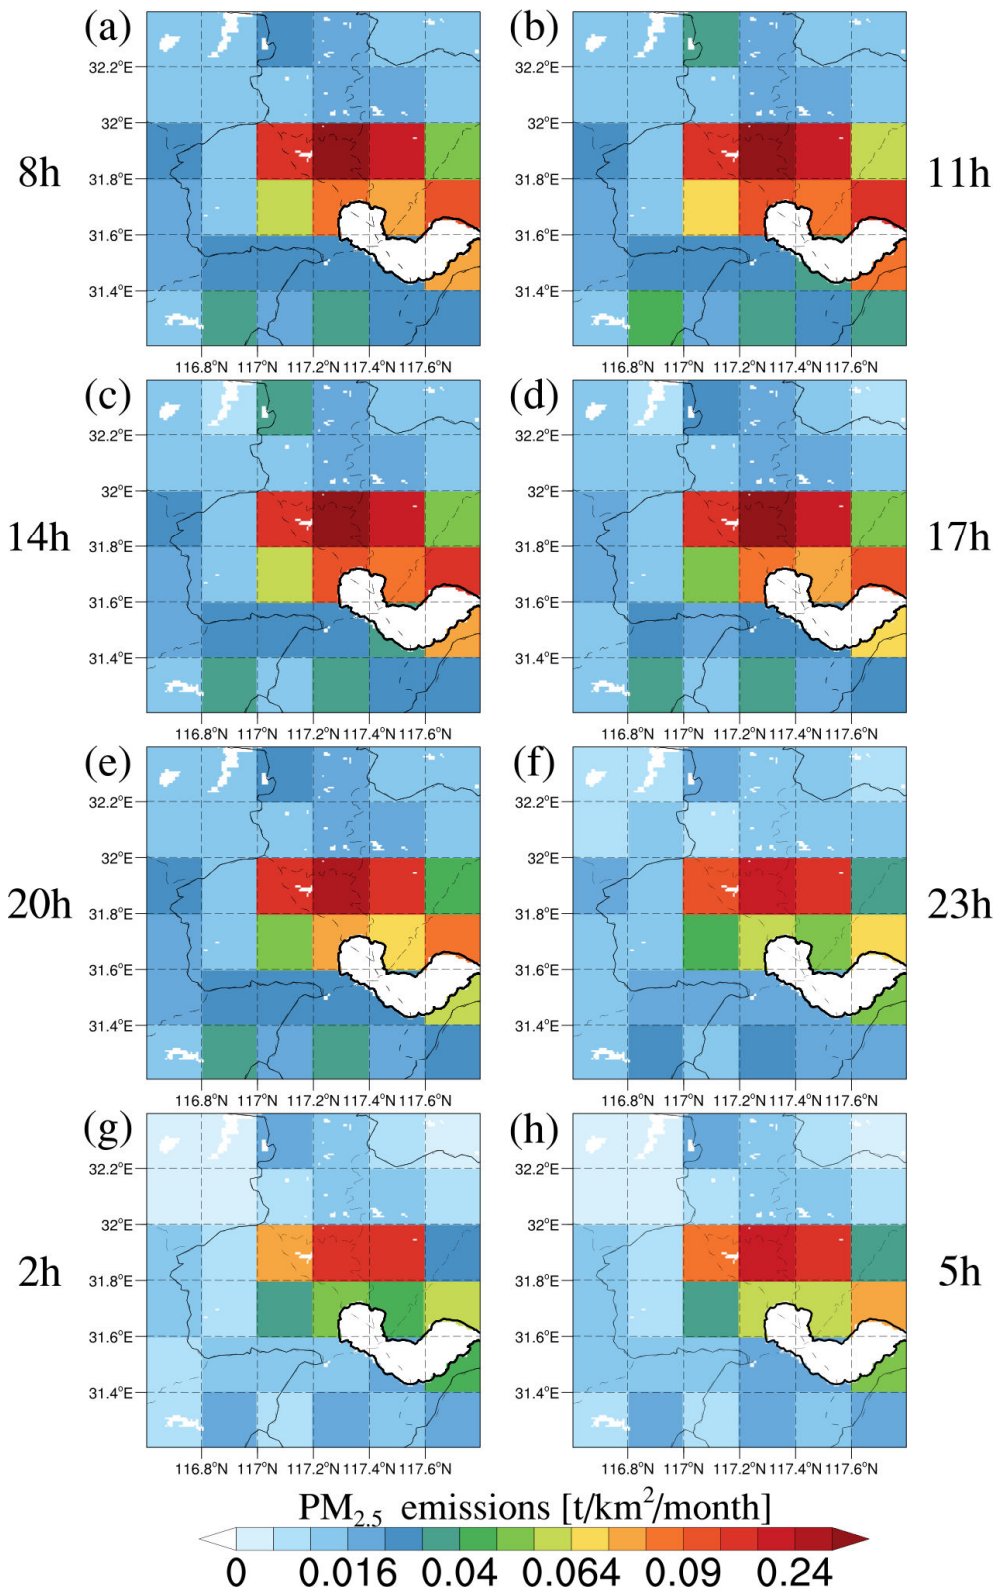

110

111 **Figure S2.** Spatial distribution of  $PM_{2.5}$  emissions in both the Lake and Nolake

112 experiments at 08:00, 11:00, 14:00, 17:00, 20:00, 23:00, 02:00, and 05:00 local time

113 (LT), averaged over 10-20 March 2019, throughout the study area.

114

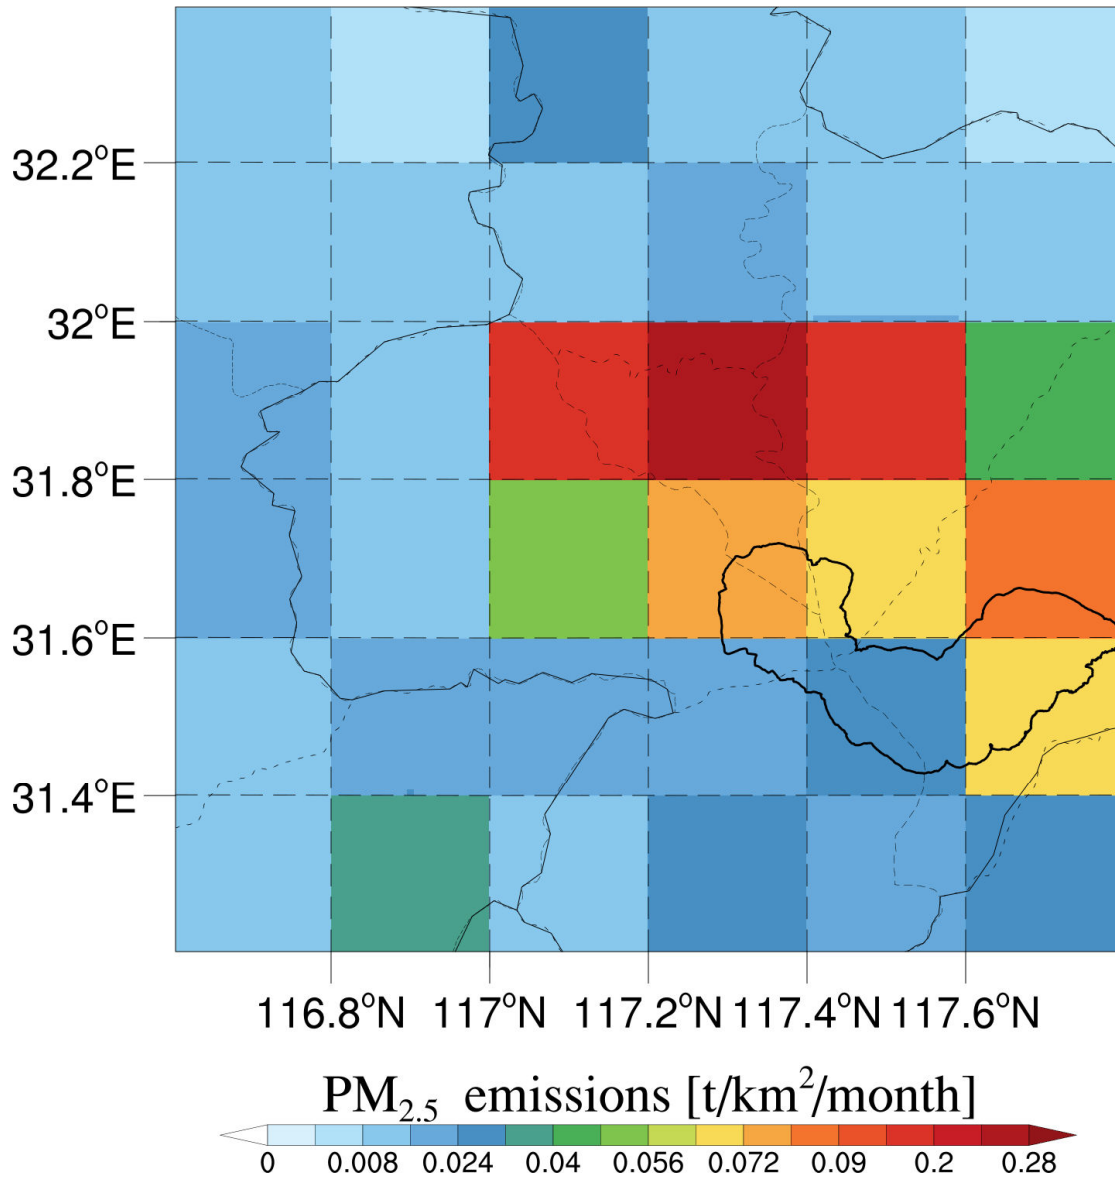

115

116 **Figure S3.** The spatial distribution of PM<sub>2.5</sub> near-surface emissions in both the

117 Lake\_emis and Nolake\_emis experiments throughout the study area, averaged over 10-

118 20 March 2019.

119

120

121

122

123

124

125

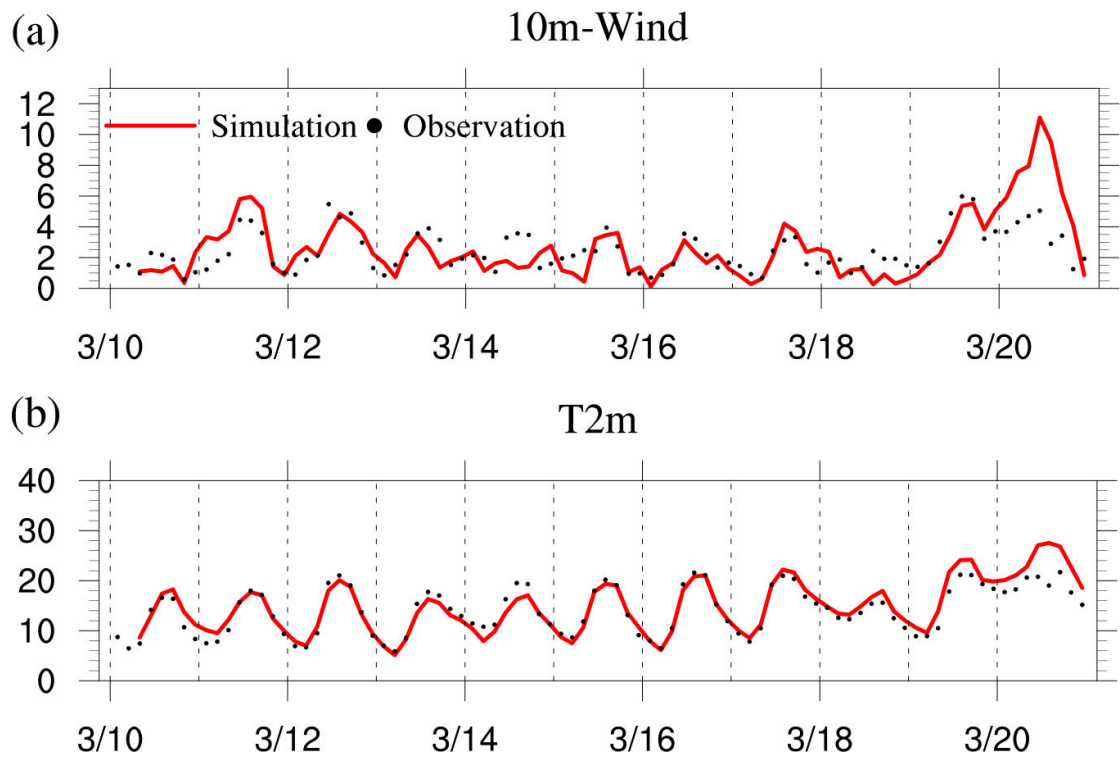

126  
 127 **Figure S4.** Time series of observed (black dots) and simulated (red line) wind speed at  
 128 10 m (top panel,  $\text{m s}^{-1}$ ) and temperature at 2 m (middle panel,  $^{\circ}\text{C}$ ) from the Lake  
 129 experiment, averaged over 4 AWS sites in Hefei.

130  
 131  
 132  
 133  
 134  
 135  
 136  
 137  
 138  
 139  
 140  
 141  
 142  
 143  
 144

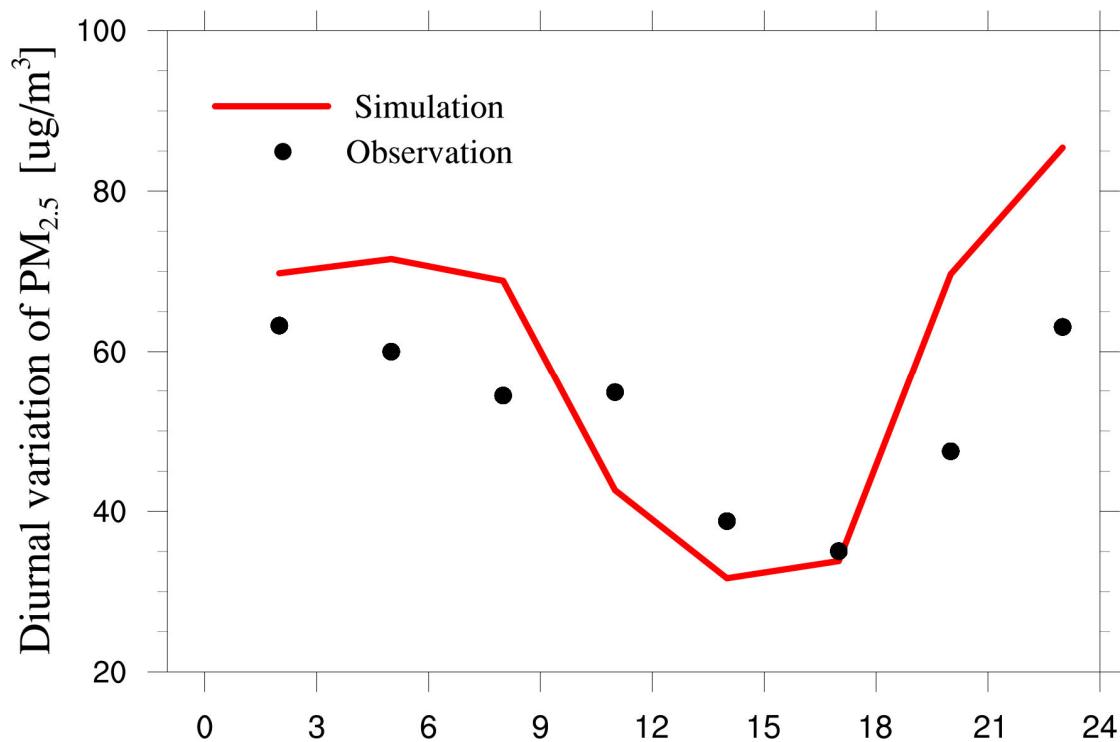

145

146 **Figure S5.** Diurnal variation of PM<sub>2.5</sub> near-surface concentrations within 24 h averaged  
 147 over 10 MEP sites in Hefei during the study period for the Lake experiment (solid red  
 148 line) and observations (black dot). Both the simulated results and observations are  
 149 sampled at the model output frequency, i.e., 3-hourly.

150

151

152

153

154

155

156

157

158

159

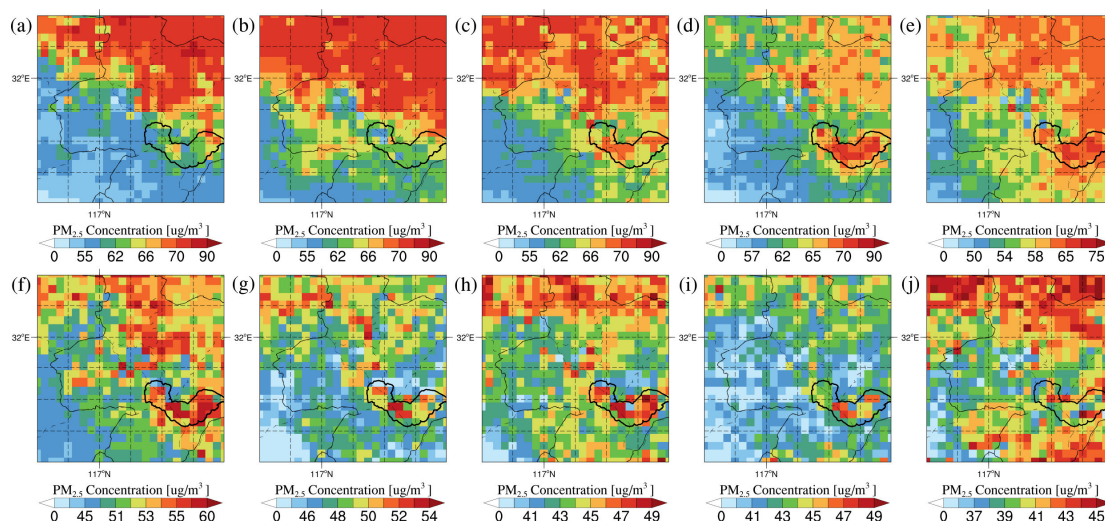

160

161 **Figure S6.** The spatial distribution of PM<sub>2.5</sub> near-surface concentrations from the  
 162 ChinaHighPM<sub>2.5</sub> dataset (satellite-derived hourly 5 km resolution ground-level PM<sub>2.5</sub>  
 163 for Eastern China, 2018) at (a-j) 08:00, 09:00, 10:00, 11:00, 12:00, 13:00, 14:00, 15:00,  
 164 16:00, and 17:00 LT across the study area, averaged over the period of March 2018.  
 165 This dataset belongs to the “Long-term, Seamless, High-resolution, High-quality  
 166 Dataset of Air Pollutants in China” series (i.e., the “China High Air Pollutants” (CHAP)  
 167 dataset). The ChinaHighPM<sub>2.5</sub> dataset integrates multi-source big data (e.g., ground  
 168 observation data, satellite remote sensing products, atmospheric reanalysis, and  
 169 numerical model simulations) using artificial intelligence, fully considering the  
 170 spatiotemporal heterogeneity characteristics of air pollution.

171

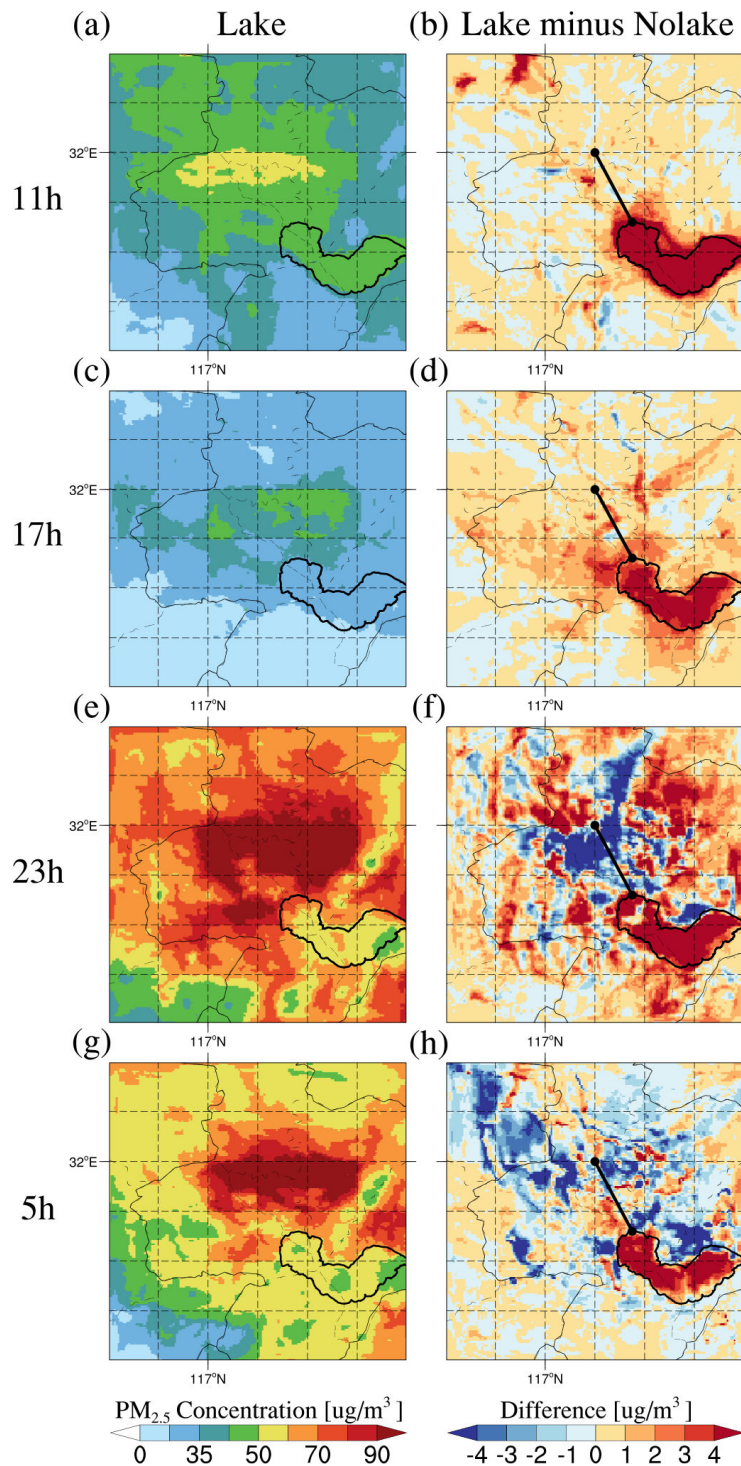

172

173 **Figure S7.** The spatial distribution of PM<sub>2.5</sub> near-surface concentrations in the (a, c, e, g) Lake experiment and (b, d, f, h) the differences between Lake and Nolake  
 174 experiments (Lake minus Nolake) at 11:00, 17:00, 23:00, and 05:00 LT across the study  
 175 area, averaged over 10-20 March 2019. Note that the line segments shown in panels (b,  
 176 a, d, f, h) correspond to the AB transect marked in Figure 2.  
 177

178

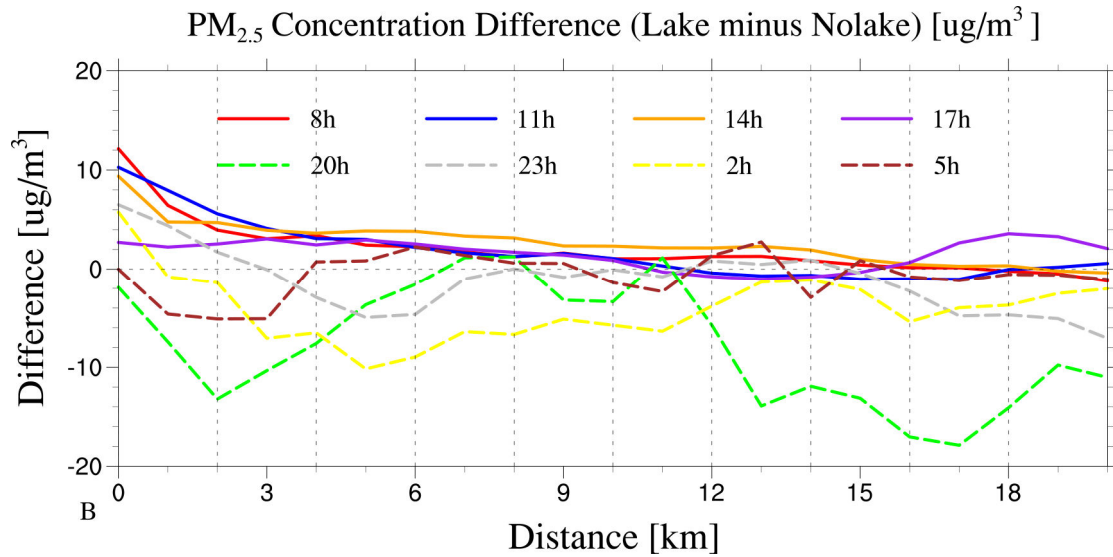

179

180 **Figure S8.** Average PM<sub>2.5</sub> near-surface concentration differences (Lake minus Nolake)  
 181 at 08:00, 11:00, 14:00, 17:00, 20:00, 23:00, 02:00, and 05:00 LT, averaged over 10-20  
 182 March 2019, as a function of distance from point B toward A. The x-axis represents the  
 183 distance from point B along the path and the y-axis presents the concentration  
 184 difference.

185

186

187

188

189

190

191

192

193

194

195

196

197

198

199

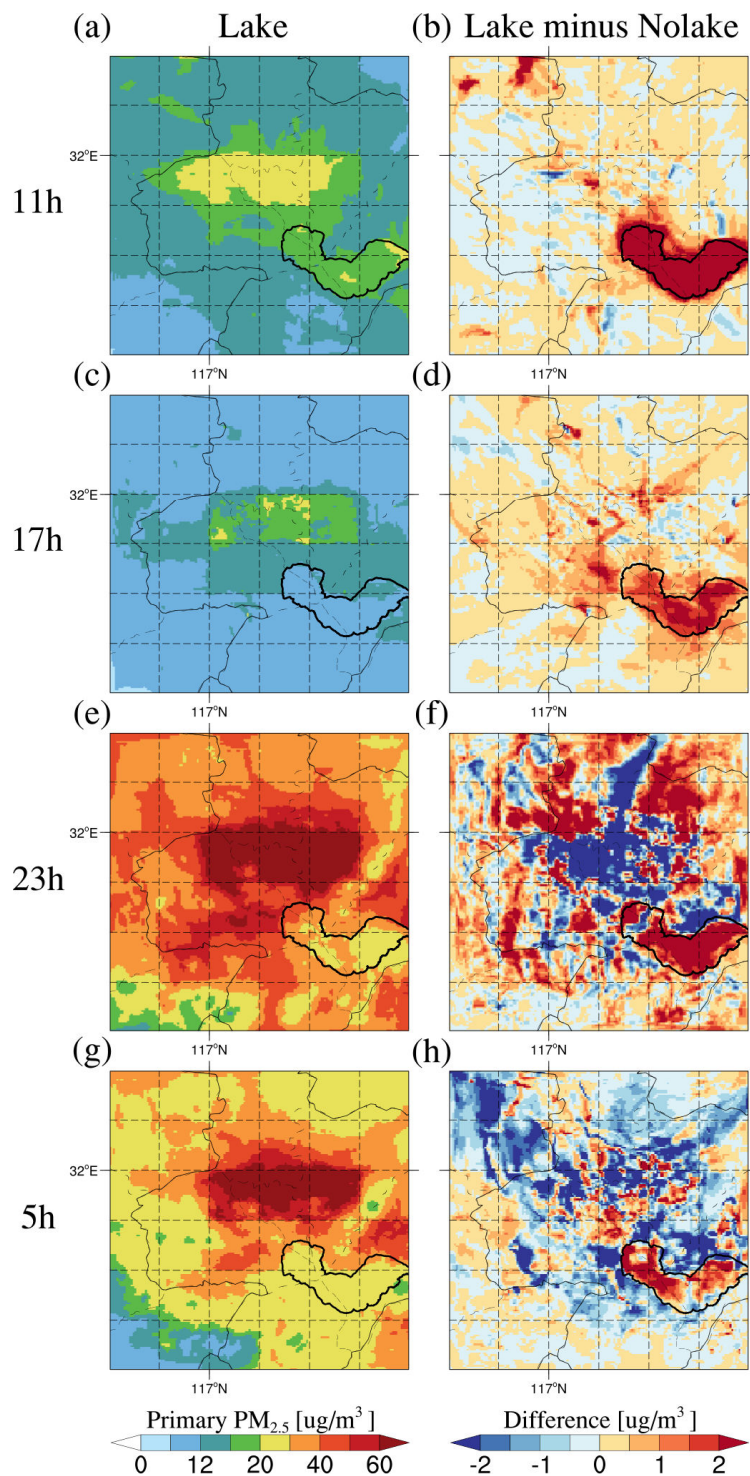

200

201 **Figure S9.** The spatial distribution of primary PM<sub>2.5</sub> near-surface concentrations (sum  
 202 of black carbon (BC), organic carbon (OC), and other inorganics (OIN)) in the (a, c,  
 203 e, g) Lake experiment and (b, d, f, h) the differences between Lake and Nolake  
 204 experiments (Lake minus Nolake) at 11:00, 17:00, 23:00, and 05:00 LT across the study  
 205 area, averaged over 10-20 March 2019.

206

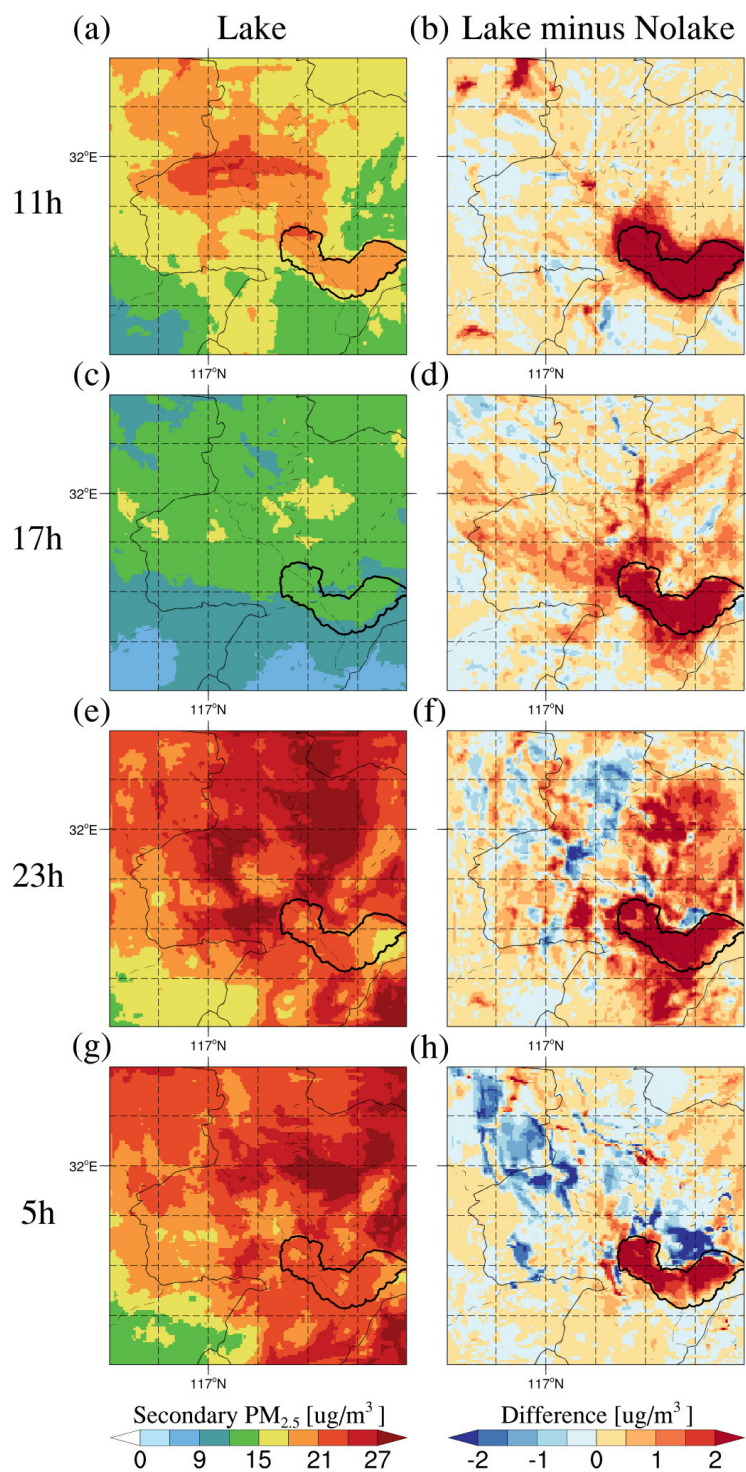

207

208 **Figure S10.** The spatial distribution of secondary PM<sub>2.5</sub> near-surface concentrations

209 (sum of sulfate (SO<sub>4</sub><sup>2-</sup>), nitrate (NO<sub>3</sub><sup>-</sup>), and ammonium (NH<sub>4</sub><sup>+</sup>)) in the (a, c, e, g)

210 Lake experiment and (b, d, f, h) the differences between Lake and Nolake

211 experiments (Lake minus Nolake) at 11:00, 17:00, 23:00, and 05:00 LT across the study

212 area, averaged over 10-20 March 2019.

213

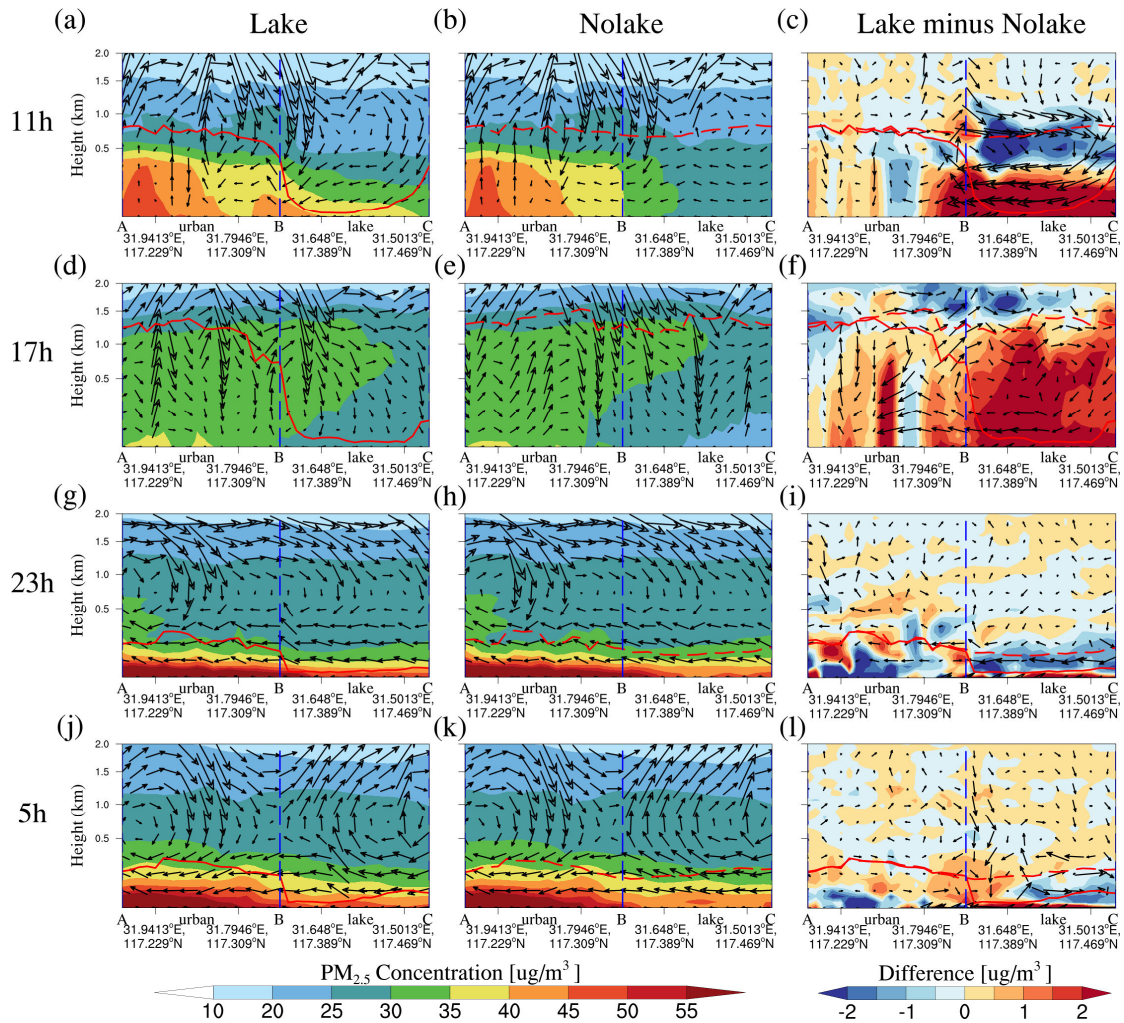

214

215 **Figure S11.** The vertical cross-section of PM<sub>2.5</sub> concentration and wind vectors along  
 216 the key path AC (indicated in Figure 2) for the (a、 d、 g、 j) Lake experiment, (b、 e、  
 217 h、 k) Nolake experiment, and (c、 f、 i、 l) their differences (Lake minus Nolake) at  
 218 11:00, 17:00, 23:00, and 05:00 LT, averaged over 10-20 March 2019. The shaded  
 219 contours represent PM<sub>2.5</sub> concentrations or their differences between the two  
 220 experiments at each altitude. The black vector arrows indicate the superimposed  
 221 vertical wind field (including horizontal and vertical wind components), with the  
 222 vertical wind vector being multiplied by 50 for visibility. The red solid line represents  
 223 the planetary boundary layer height (PBLH) in the Lake experiment, and the red dashed  
 224 line represents the PBLH in the Nolake experiment. The blue dashed line represents the  
 225 lake-land boundary.

226

227

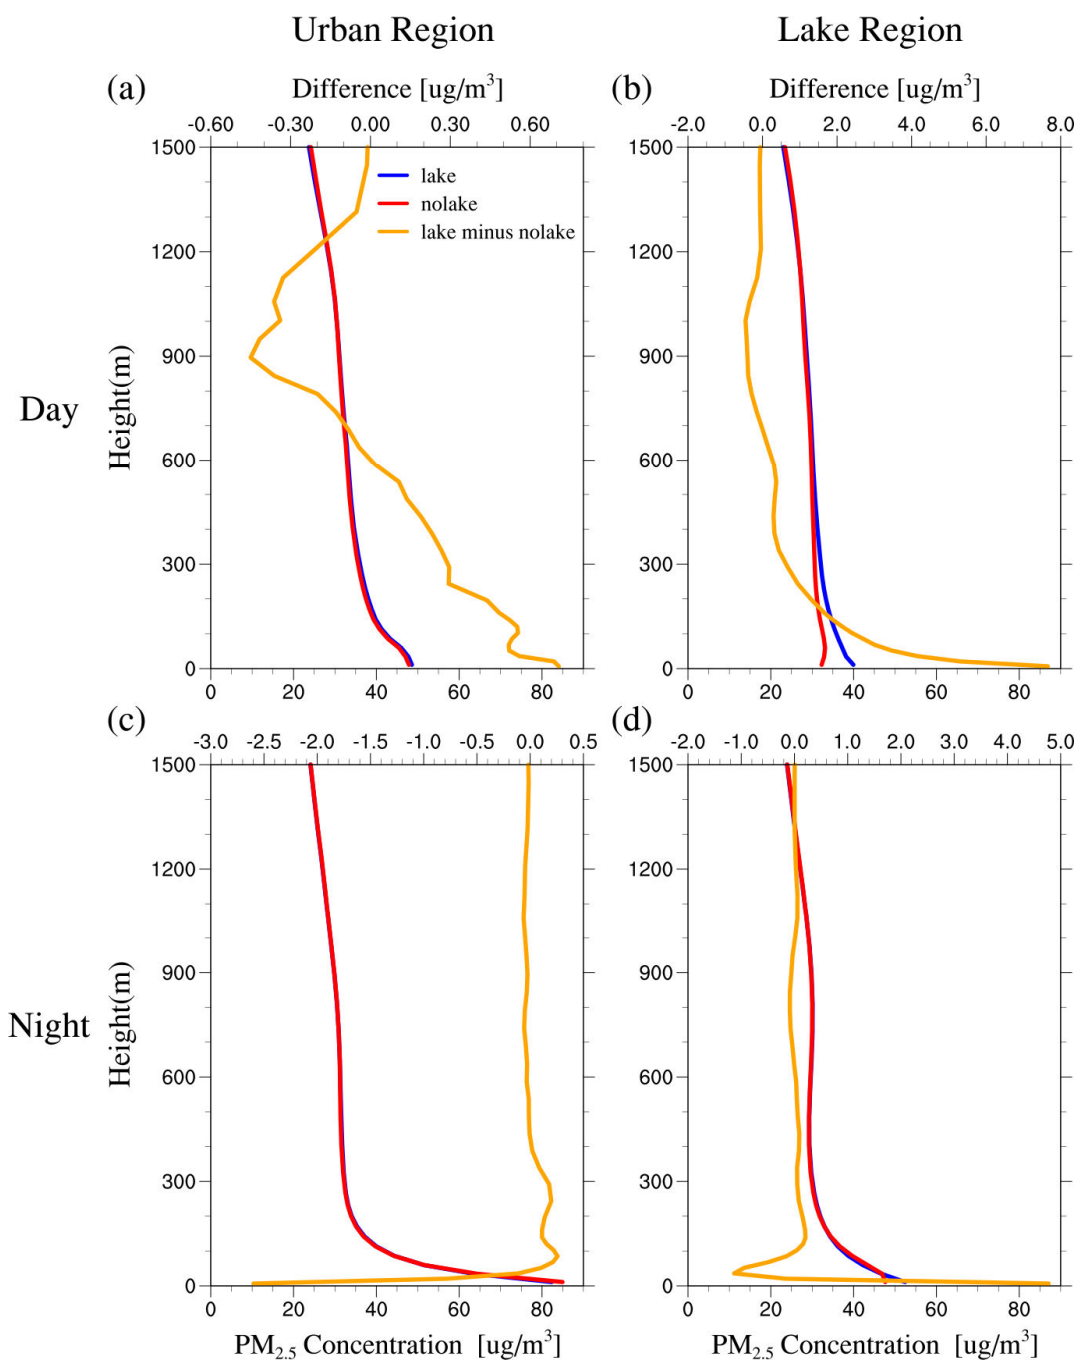

228

229 **Figure S12.** The vertical profiles of  $PM_{2.5}$  concentrations simulated in the Lake  
 230 experiment (solid blue line), Nolake experiment (solid red line), and their differences  
 231 (Lake minus Nolake, solid orange line) over (a, c) urban and (b, d) lake regions during  
 232 daytime and nighttime, averaged over 10-20 March 2019. Note that “Urban Region”  
 233 represents the average value for areas with urban underlying surface within the study  
 234 domain, while “Lake Region” represents the average value for areas with lake  
 235 underlying surface within the study domain, to make the results more representative.

236

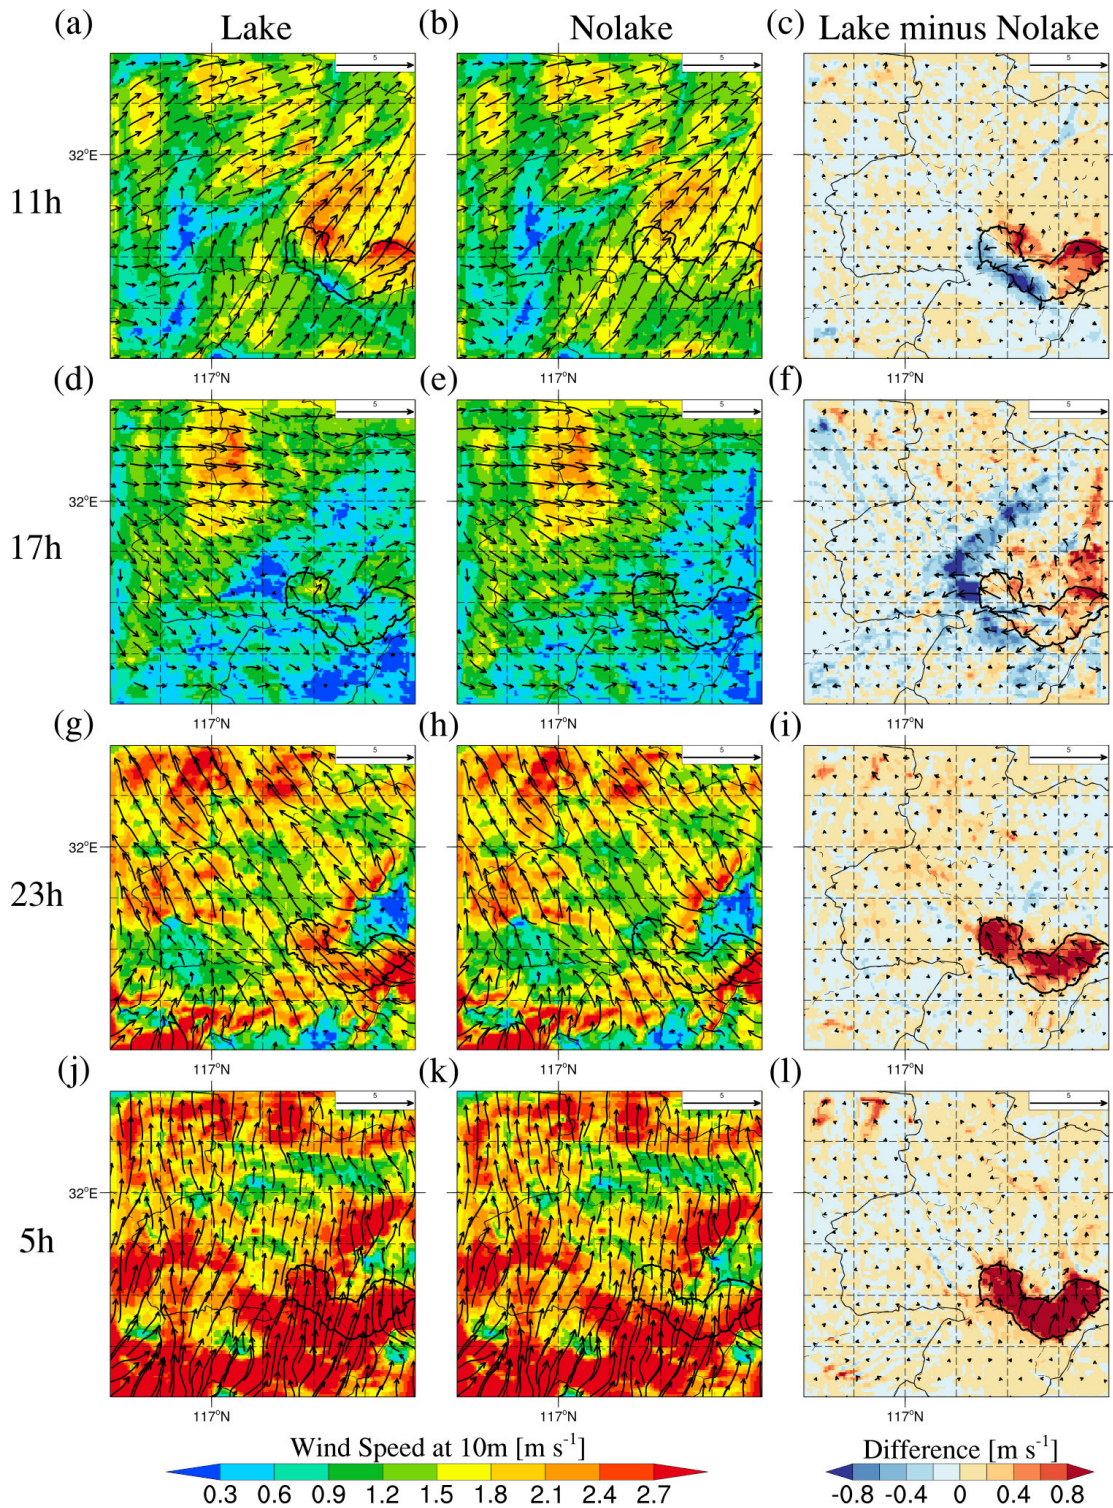

237

238 **Figure S13.** The spatial distribution of 10-m wind speed in the (a, d, g, j) Lake  
 239 experiment, (b, e, h, k) Nolake experiment, and (c, f, i, l) their differences (Lake  
 240 minus Nolake) at 11:00, 17:00, 23:00, and 05:00 LT across the study area, averaged  
 241 over 10-20 March 2019.

242

243

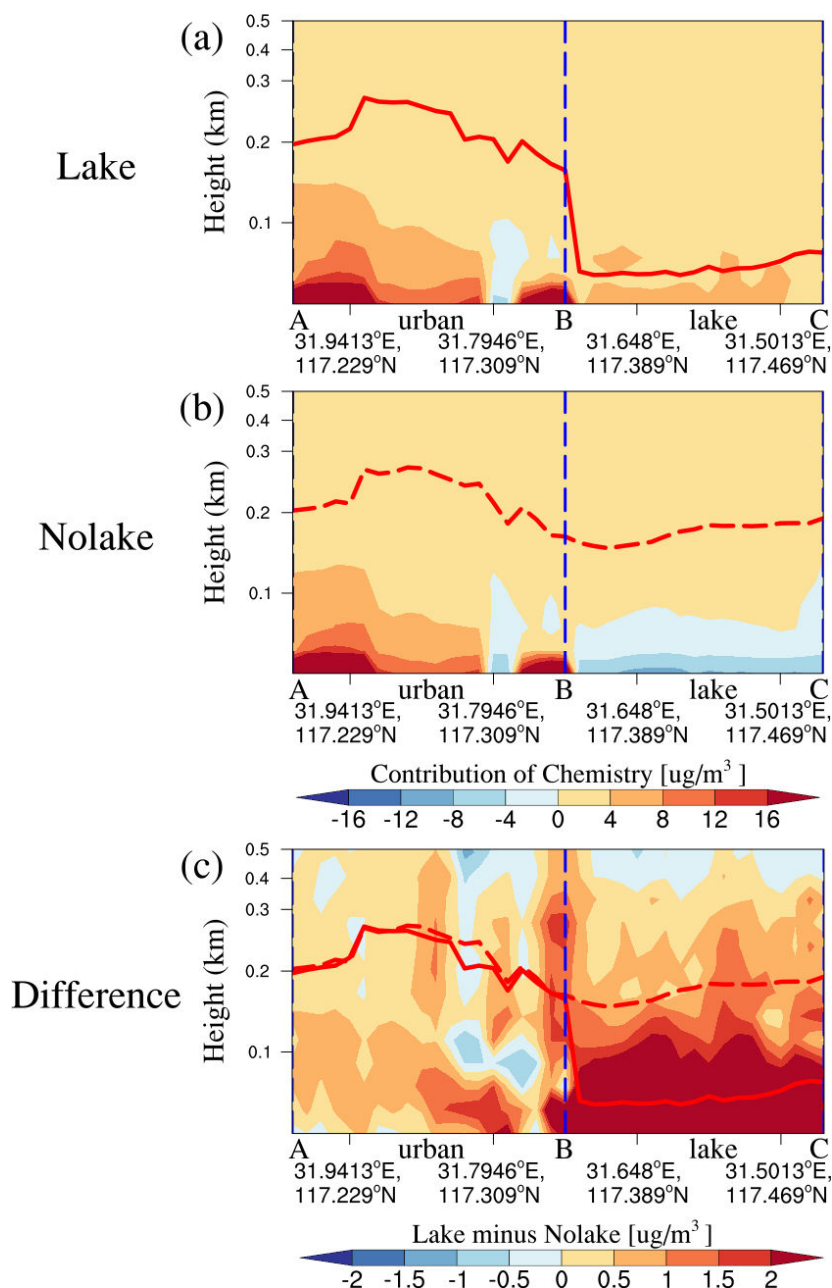

244

245 **Figure S14.** The vertical cross-section of chemical process contributions to  $PM_{2.5}$   
 246 concentrations along the key path AC (indicated in Figure 2) for the (a) Lake  
 247 experiment, (b) Nolake experiment, and (c) their differences (Lake minus Nolake)  
 248 during nighttime, averaged over 10-20 March 2019. The shaded contours represent the  
 249 contribution of chemical processes to surface  $PM_{2.5}$  concentrations or their differences  
 250 between the two experiments at each altitude. The red solid line represents the PBLH  
 251 in the Lake experiment, and the red dashed line represents the PBLH in the Nolake  
 252 experiment. The blue dashed line represents the lake-land boundary.

253

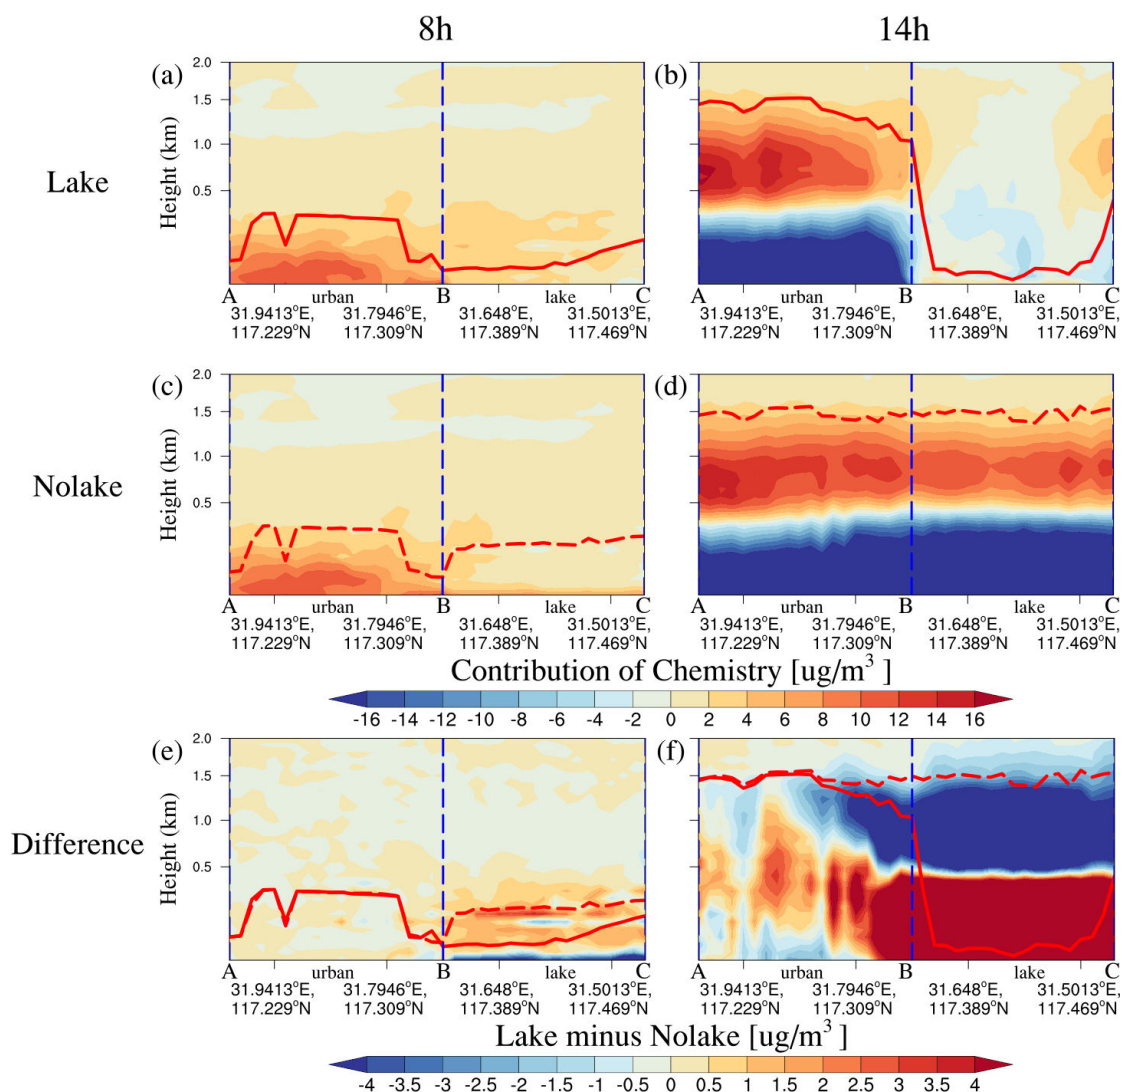

254

255 **Figure S15.** The vertical cross-section of chemical process contributions to  $PM_{2.5}$   
 256 concentrations along the key path AC (indicated in Figure 2) for the (a、b) Lake  
 257 experiment, (c、d) Nolake experiment, and (e、f) their differences (Lake minus  
 258 Nolake) at 08:00 and 14:00 LT, averaged over 10-20 March 2019. The shaded contours  
 259 represent the contribution of chemical processes to surface  $PM_{2.5}$  concentrations or their  
 260 differences between the two experiments at each altitude. The red solid line represents  
 261 the planetary boundary layer height (PBLH) in the Lake experiment, and the red dashed  
 262 line represents the PBLH in the Nolake experiment. The blue dashed line represents the  
 263 lake-land boundary.

264

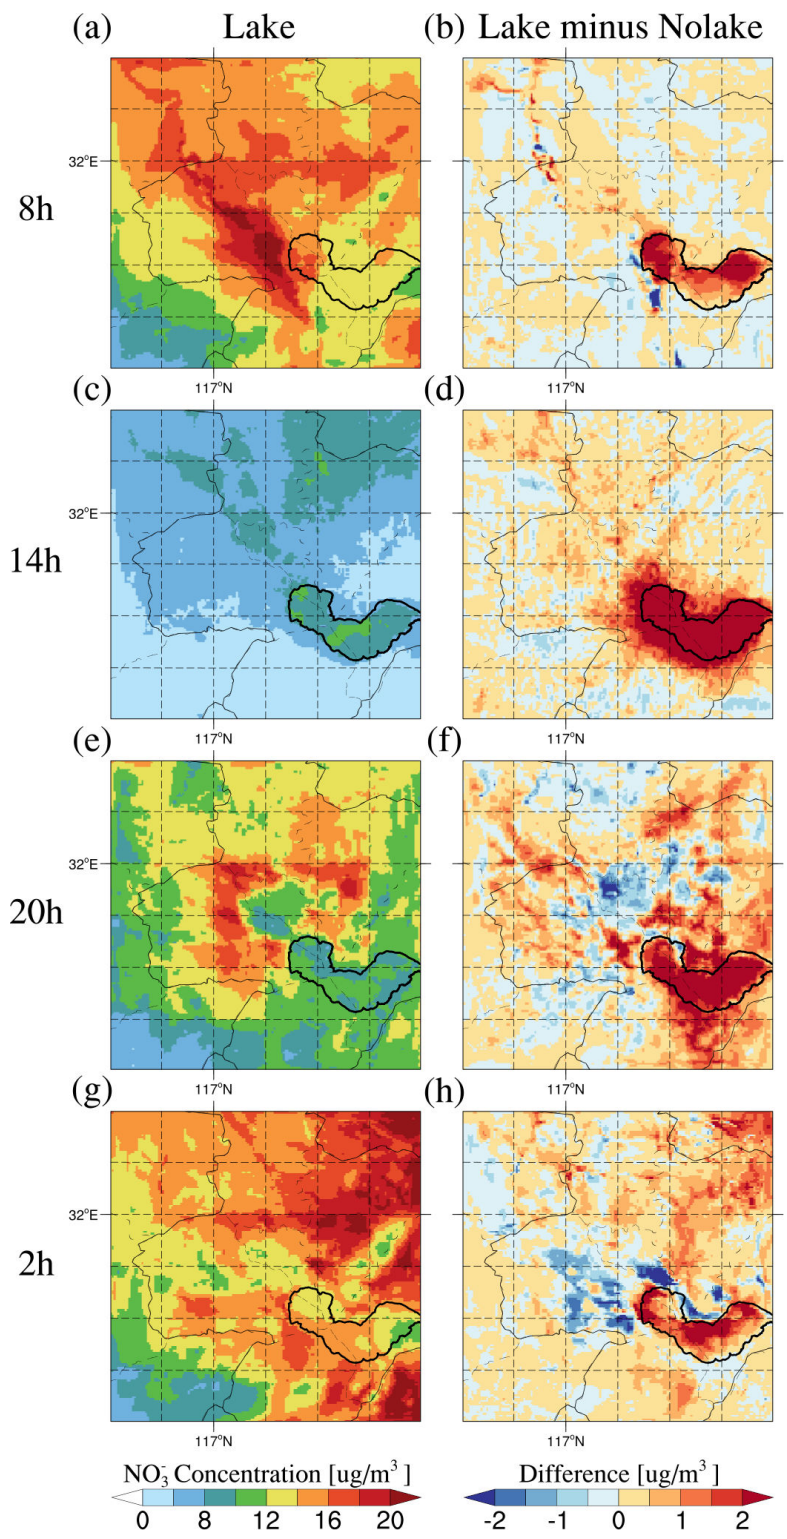

265

266 **Figure S16.** The spatial distribution of  $\text{NO}_3^-$  near-surface concentrations in the (a, c,  
 267 e, g) Lake experiment and (b, d, f, h) the differences between Lake and Nolake  
 268 experiments (Lake minus Nolake) at 08:00, 14:00, 20:00, and 02:00 LT across the study  
 269 area, averaged over 10-20 March 2019.

270

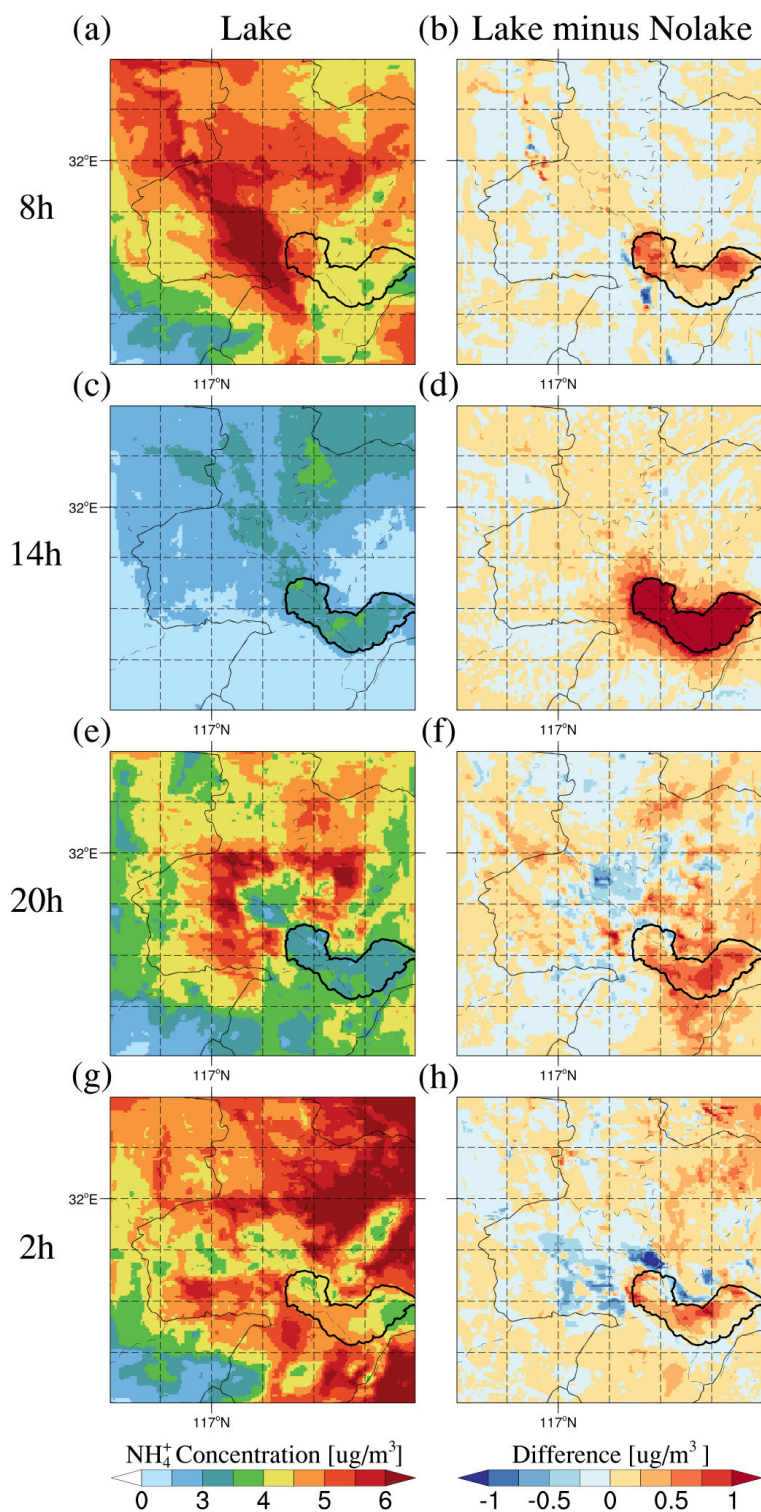

271

272 **Figure S17.** The spatial distribution of  $\text{NH}_4^+$  near-surface concentrations in the (a, c,  
 273 e, g) Lake experiment and (b, d, f, h) the differences between Lake and Nolake  
 274 experiments (Lake minus Nolake) at 08:00, 14:00, 20:00, and 02:00 LT across the study  
 275 area, averaged over 10-20 March 2019.

276

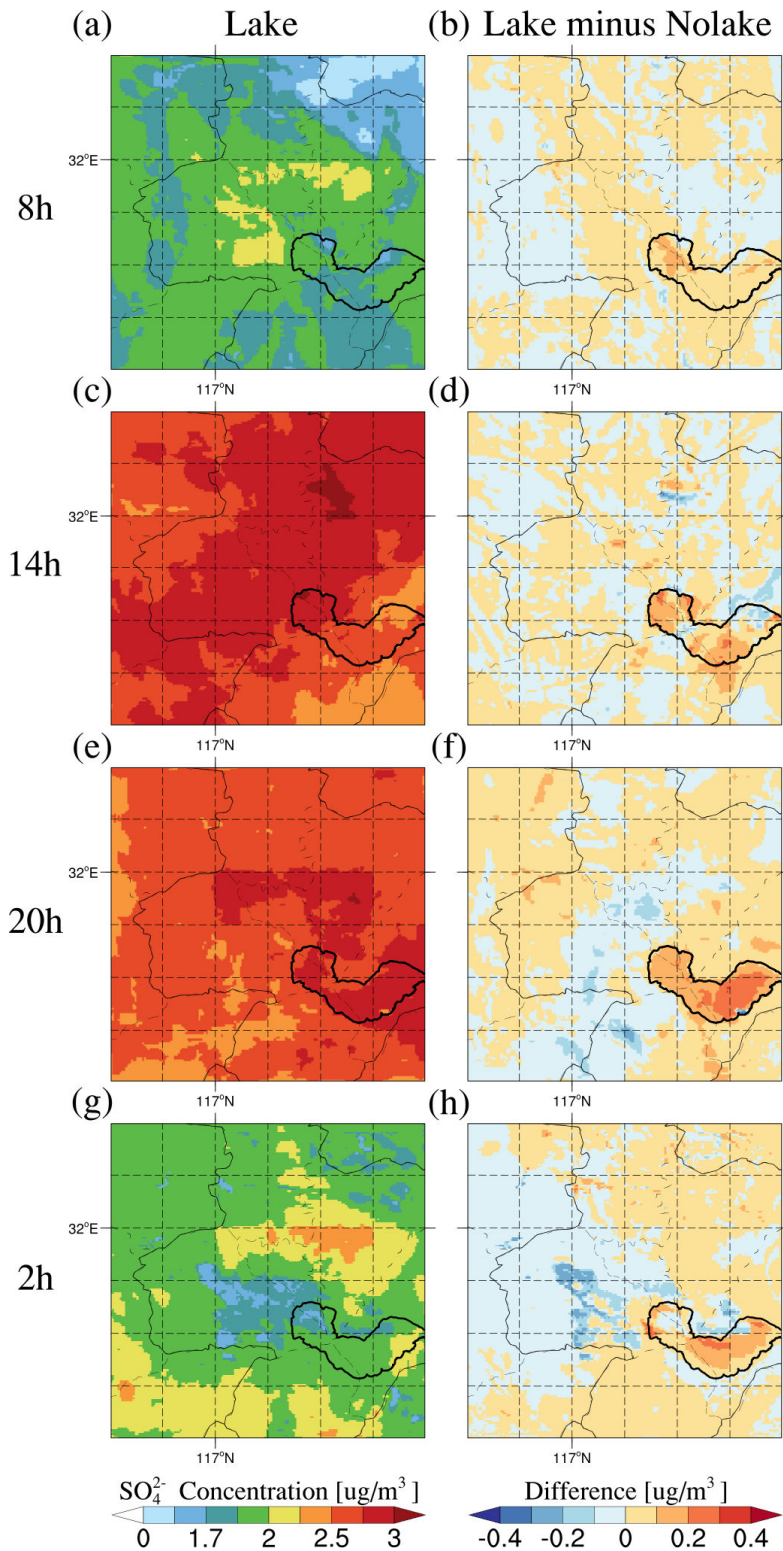

277

278 **Figure S18.** The spatial distribution of  $\text{SO}_4^{2-}$  near-surface concentrations in the (a, c,  
 279 e, g) Lake experiment and (b, d, f, h) the differences between Lake and Nolake  
 280 experiments (Lake minus Nolake) at 08:00, 14:00, 20:00, and 02:00 LT across the study  
 281 area, averaged over 10-20 March 2019.

282

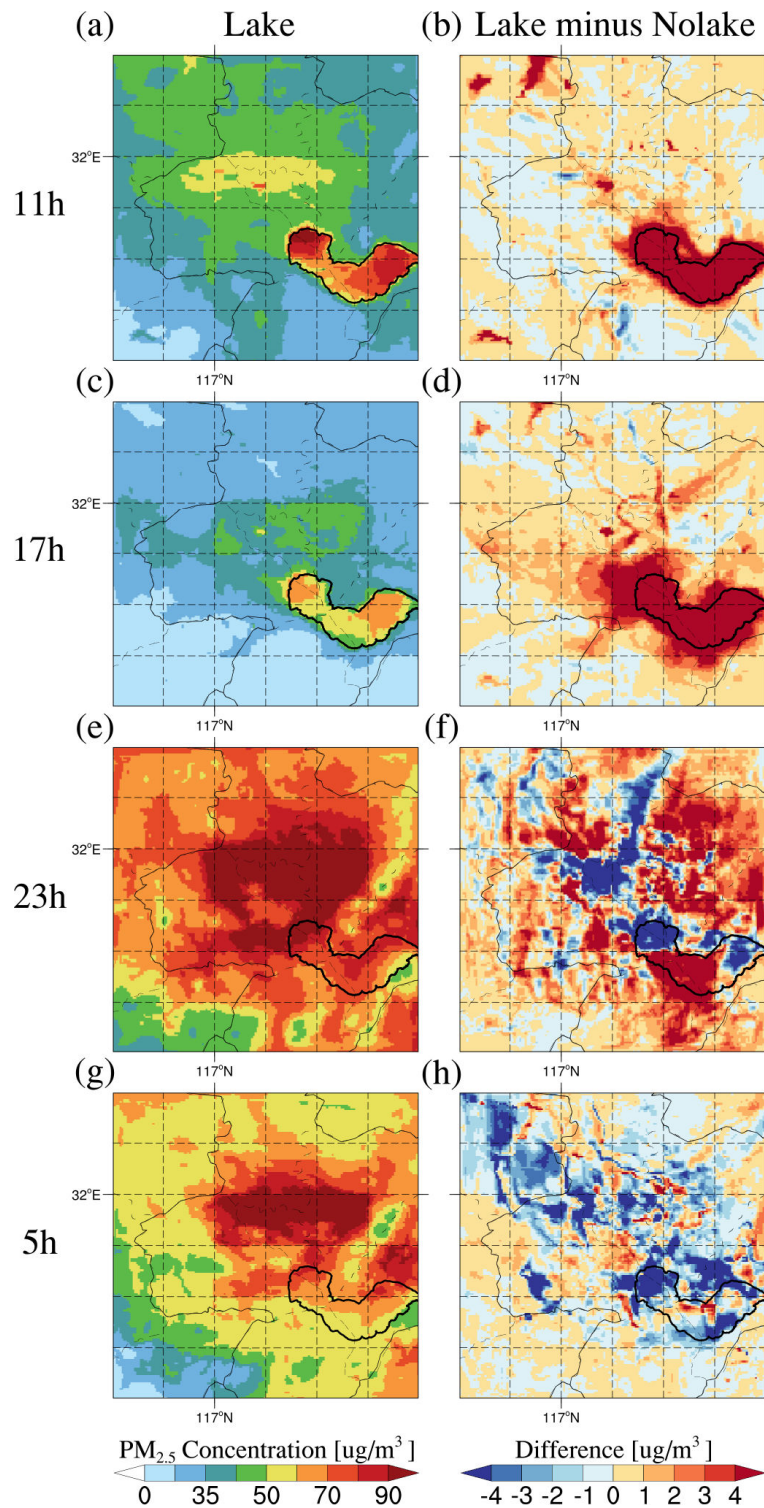

283

284 **Figure S19.** The spatial distribution of  $PM_{2.5}$  near-surface concentrations in the (a, c,  
 285 e, g) Lake\_emis experiment and (b, d, f, h) the differences between Lake\_emis  
 286 and Nolake\_emis experiments (Lake\_emis minus Nolake\_emis) at 11:00, 17:00, 23:00,  
 287 and 05:00 LT across the study area, averaged over 10-20 March 2019.

288

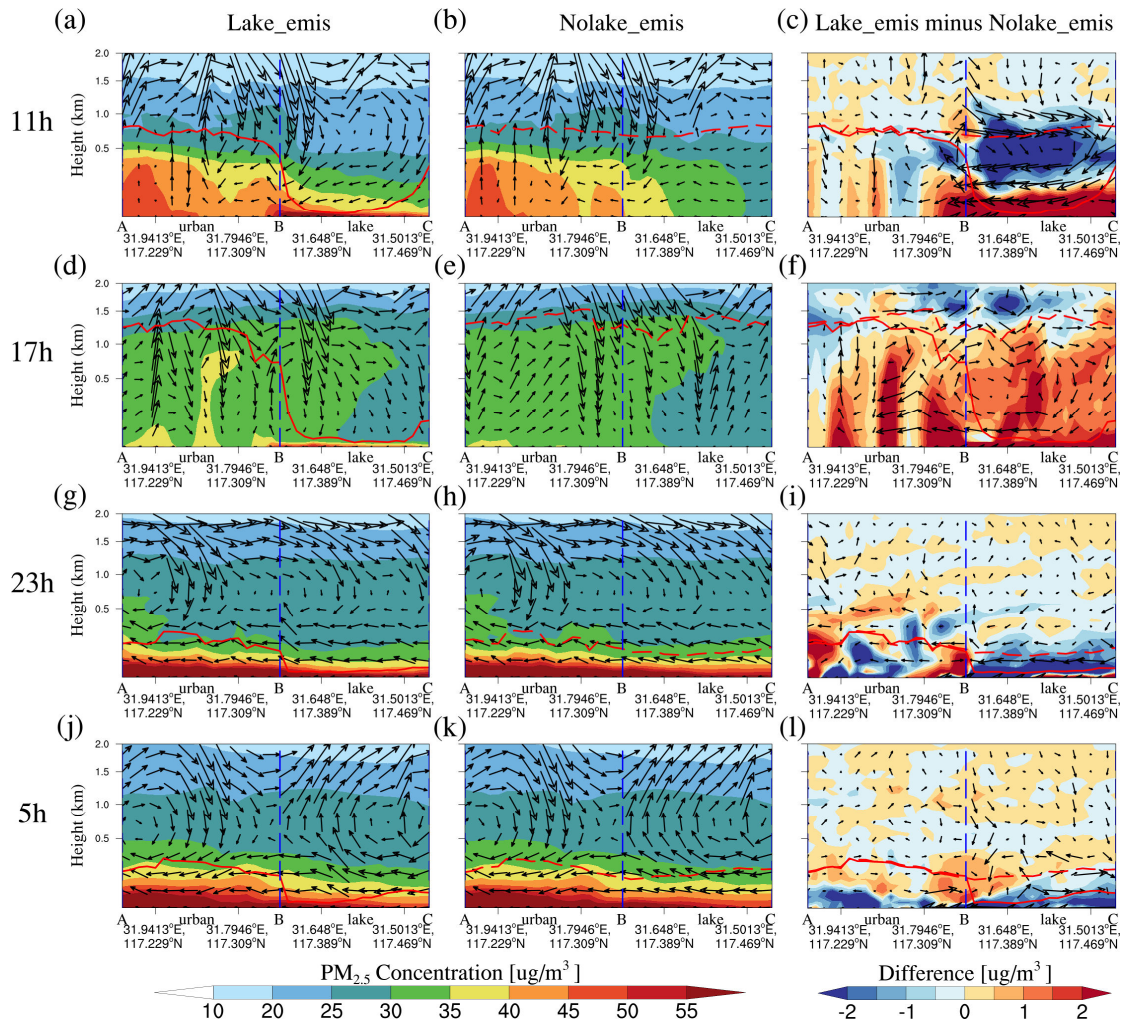

289

290 **Figure S20.** The vertical cross-section of  $PM_{2.5}$  concentration and wind vectors along  
 291 the key path AC (indicated in Figure 2) for the (a、d、g、j) Lake\_emis experiment,  
 292 (b、e、h、k) Nolake\_emis experiment, and (c、f、i、l) their differences (Lake\_emis  
 293 minus Nolake\_emis) at 11:00, 17:00, 23:00, and 05:00 LT, averaged over 10-20 March  
 294 2019. The shaded contours represent  $PM_{2.5}$  concentrations or their differences between  
 295 the two experiments at each altitude. The black vector arrows indicate the superimposed  
 296 vertical wind field (including horizontal and vertical wind components), with the  
 297 vertical wind vector being multiplied by 50 for visibility. The red solid line represents  
 298 the planetary boundary layer height (PBLH) in the Lake experiment, and the red dashed  
 299 line represents the PBLH in the Nolake experiment. The blue dashed line represents the  
 300 lake-land boundary.

301
